# Supplementary material
Source: PubMed Central journal article supplement (PMC6110979)
Supplement: NIHMS972686-supplement-Supplemental_Data_File_3.pdf [file NIHMS972686-supplement-Supplemental_Data_File_3.pdf]

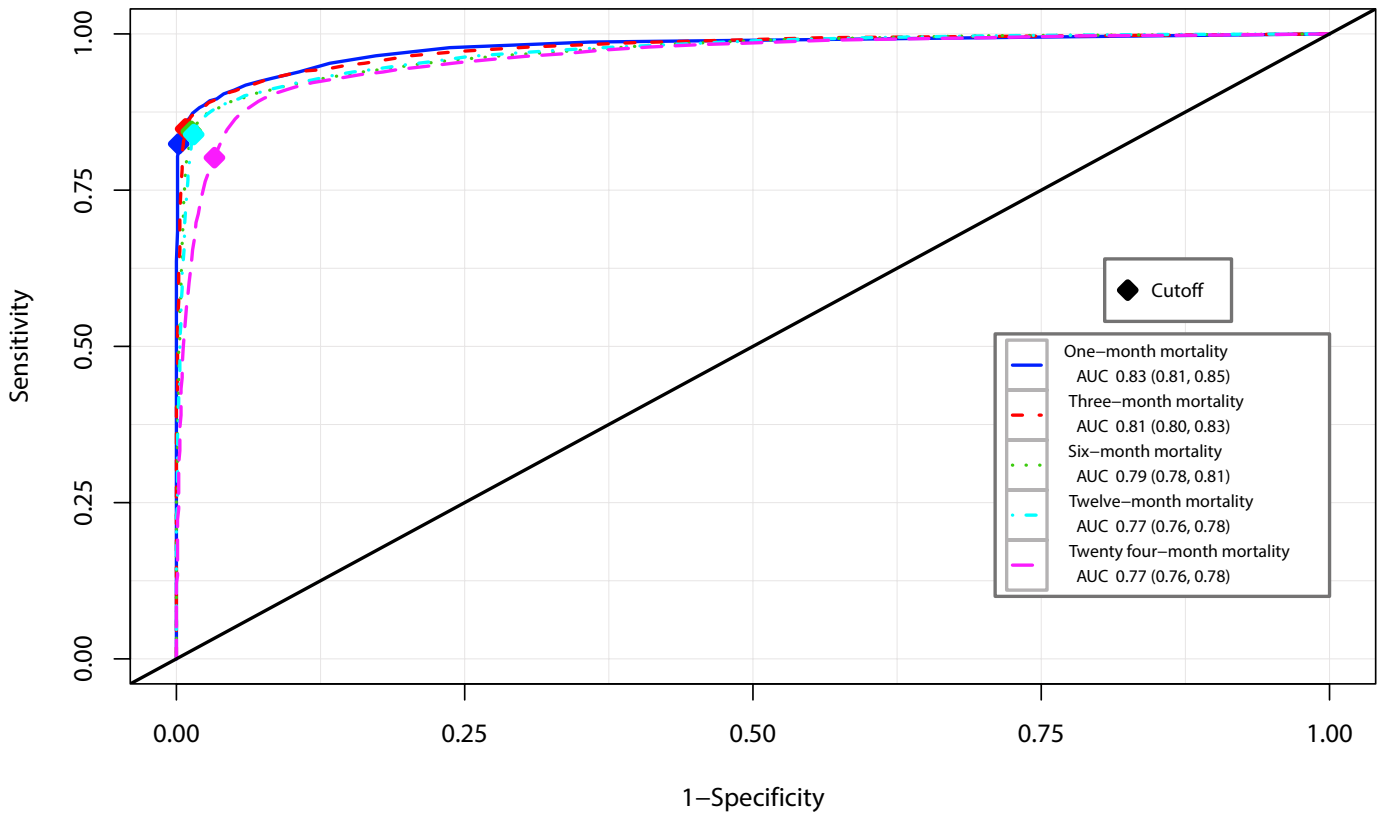

|                    | Prevalence | Sensitivity       | Specificity       | PPV               | NPV               | Accuracy          |
|--------------------|------------|-------------------|-------------------|-------------------|-------------------|-------------------|
| 1-month mortality  | 3.4%       | 0.08 (0.04, 0.12) | 0.99 (0.98, 1.00) | 0.23 (0.15, 0.34) | 0.97 (0.96, 0.97) | 0.96 (0.95, 0.96) |
| 3-month mortality  | 6.7%       | 0.24 (0.19, 0.28) | 0.97 (0.96, 0.98) | 0.34 (0.29, 0.38) | 0.95 (0.94, 0.95) | 0.92 (0.91, 0.93) |
| 6-month mortality  | 9.4%       | 0.29 (0.25, 0.33) | 0.96 (0.94, 0.96) | 0.39 (0.35, 0.44) | 0.93 (0.92, 0.94) | 0.89 (0.89, 0.90) |
| 12-month mortality | 12.8%      | 0.27 (0.24, 0.32) | 0.95 (0.93, 0.95) | 0.42 (0.38, 0.46) | 0.90 (0.89, 0.91) | 0.86 (0.85, 0.87) |
| 24-month mortality | 17.0%      | 0.34 (0.31, 0.37) | 0.91 (0.89, 0.92) | 0.43 (0.39, 0.46) | 0.87 (0.86, 0.88) | 0.81 (0.80, 0.82) |
