# Supplementary material
Source: PubMed Central journal article supplement (PMC6110979)

A hypothetical random forest

A hypothetical decision tree

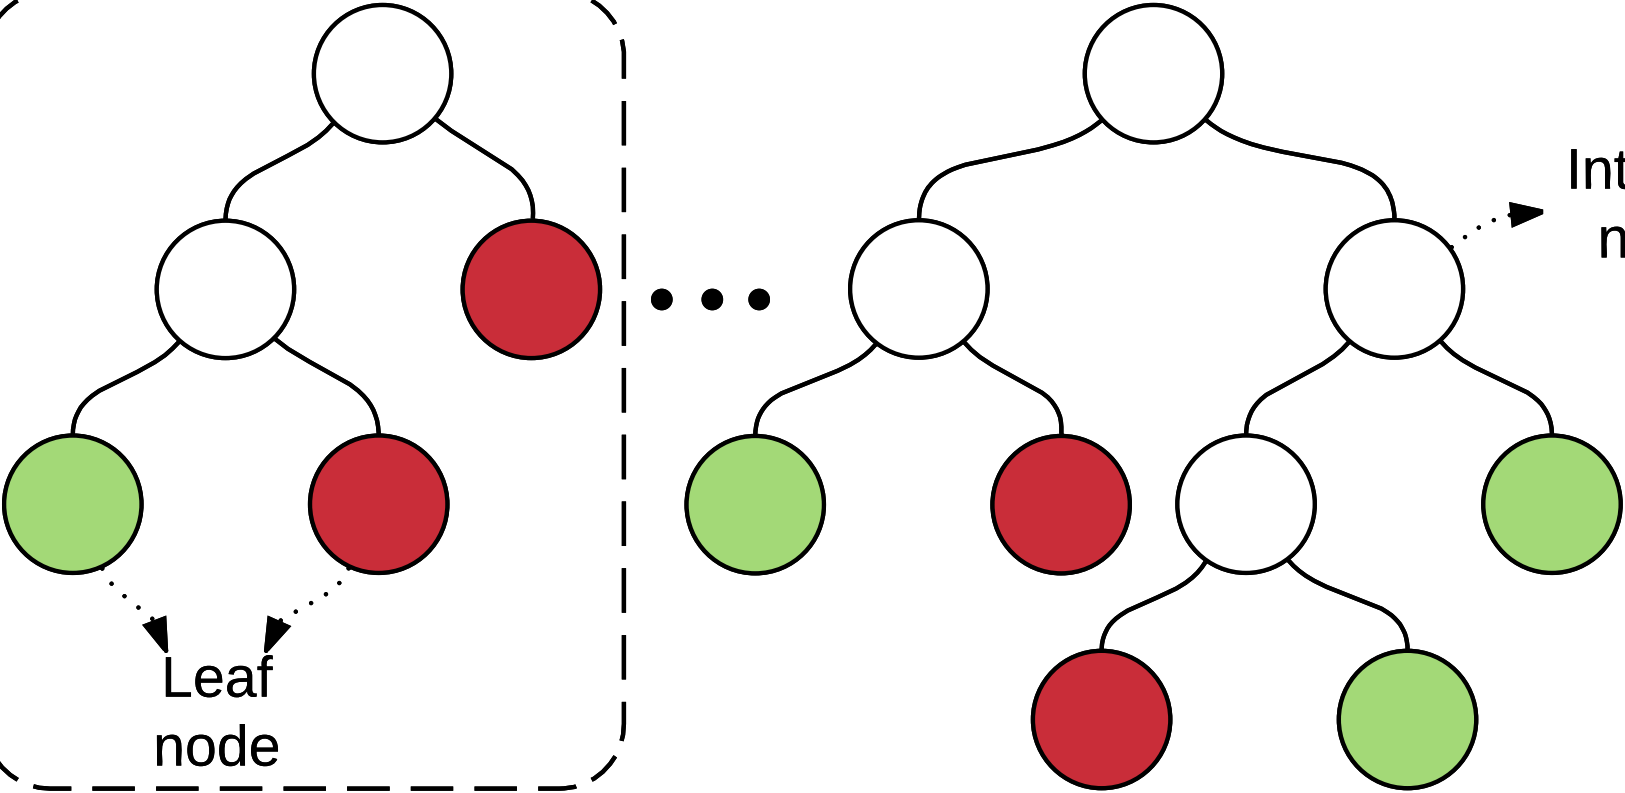

Supplement: NIHMS972686-supplement-Supplemental_Data_File_1.pdf [file NIHMS972686-supplement-Supplemental_Data_File_1.pdf]

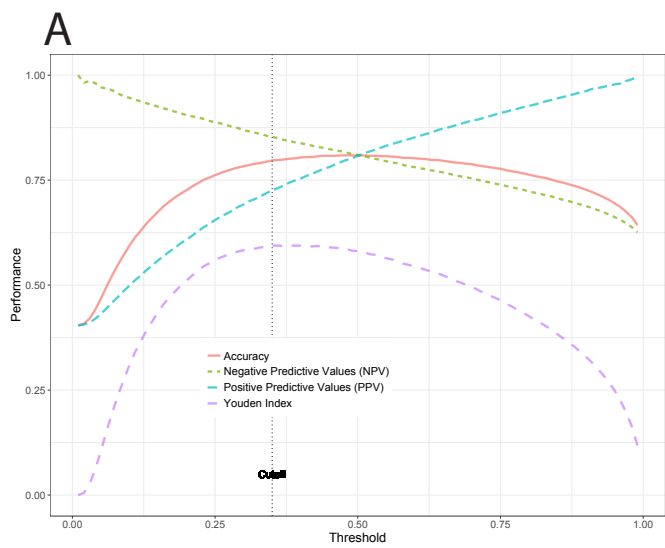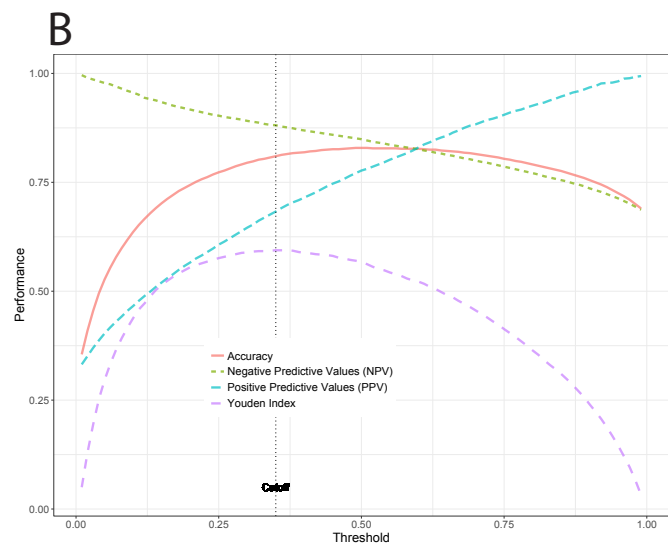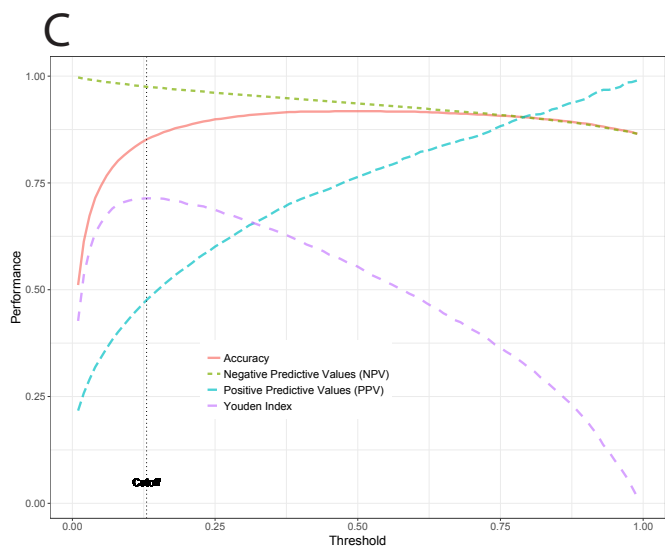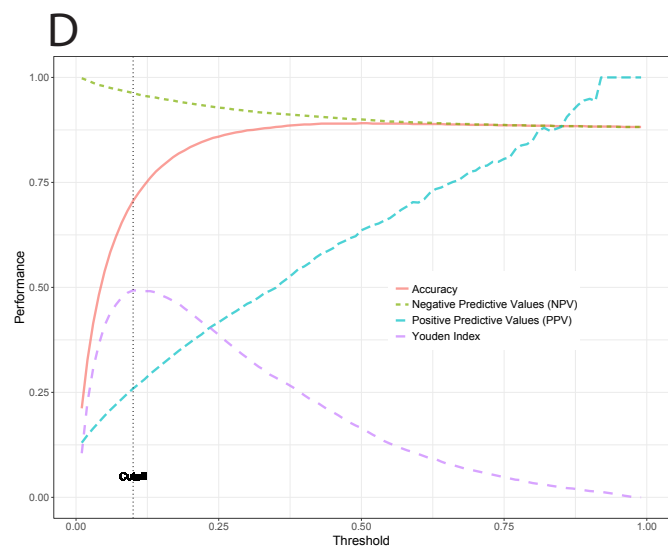

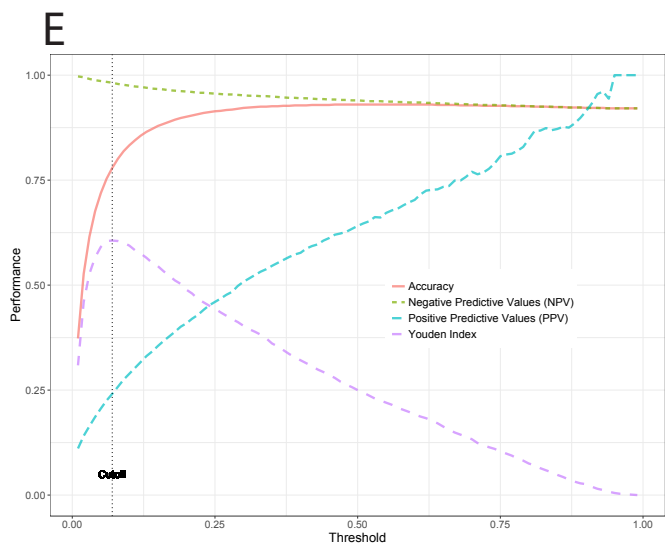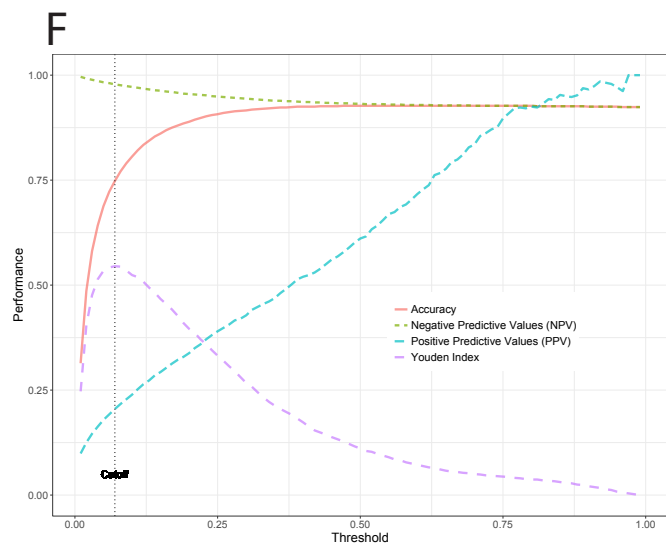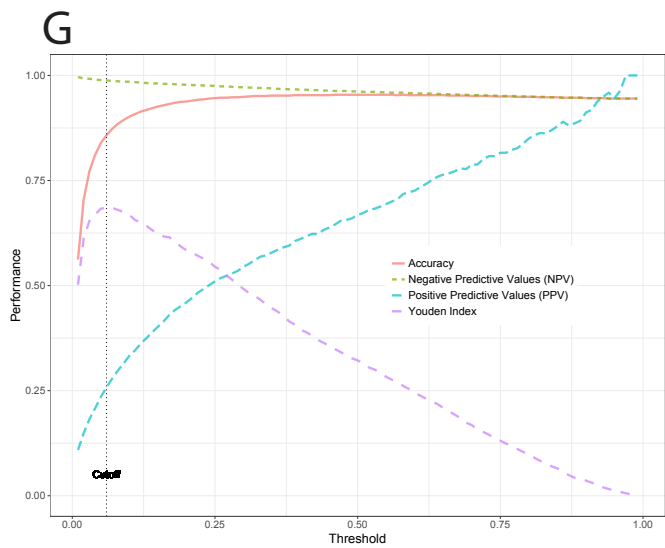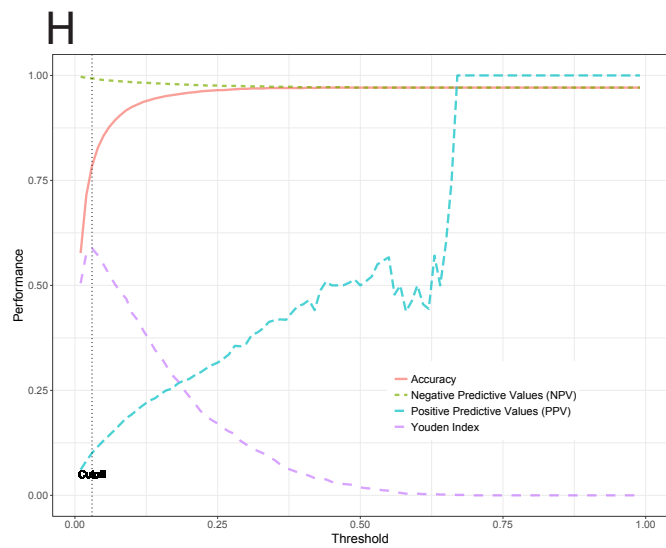

Supplement: NIHMS972686-supplement-Supplemental_Data_File_2.pdf [file NIHMS972686-supplement-Supplemental_Data_File_2.pdf]

**A**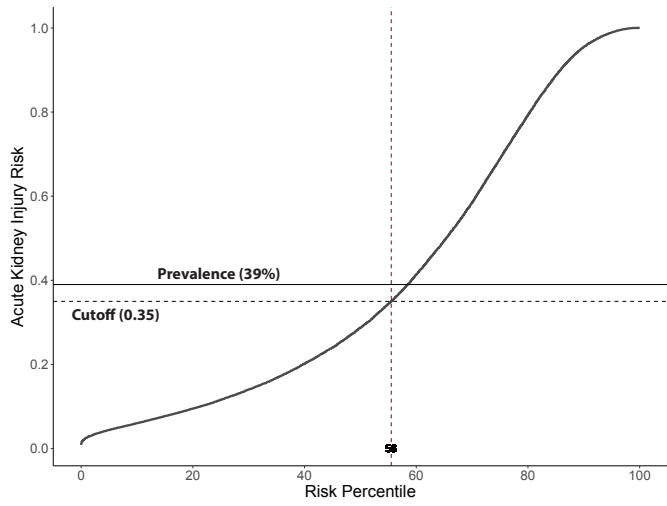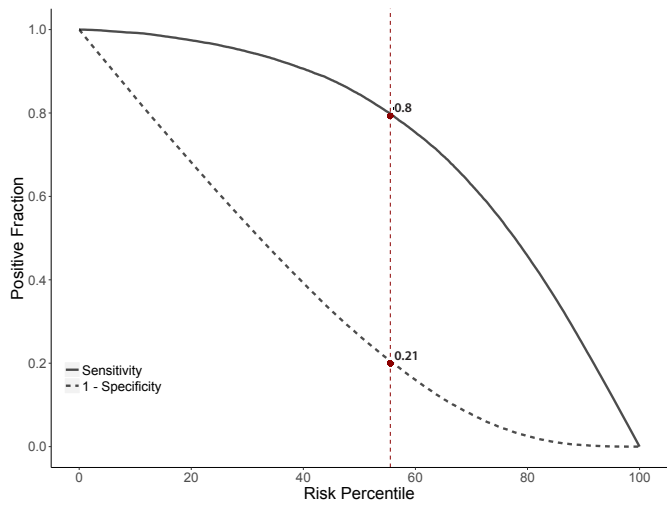**B**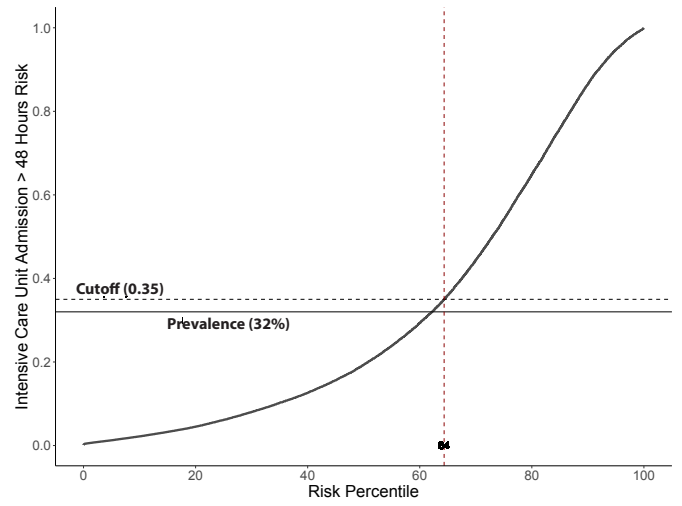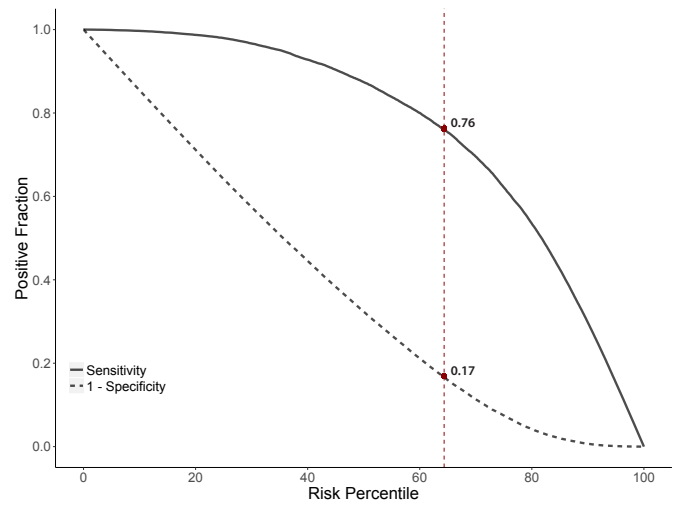

Supplement: NIHMS972686-supplement-Supplemental_Data_File_4.pdf [file NIHMS972686-supplement-Supplemental_Data_File_4.pdf]

**C**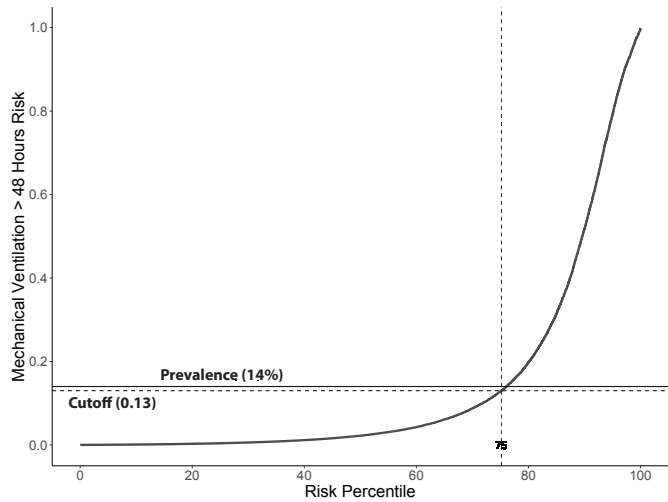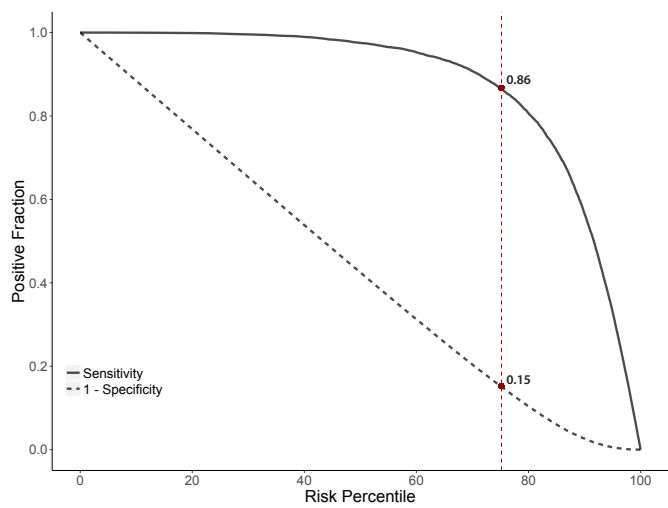**D**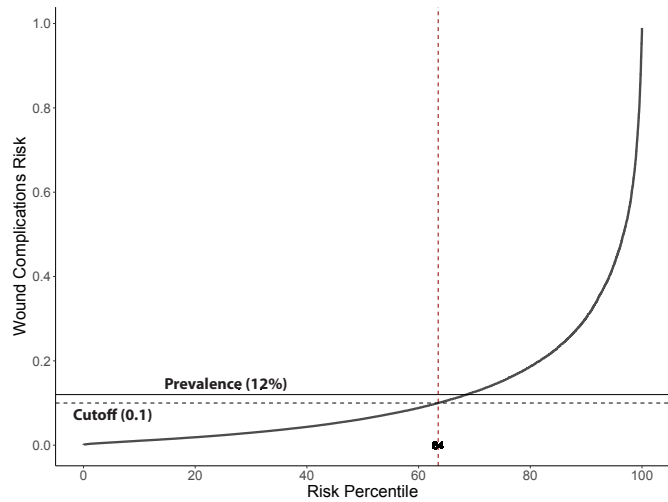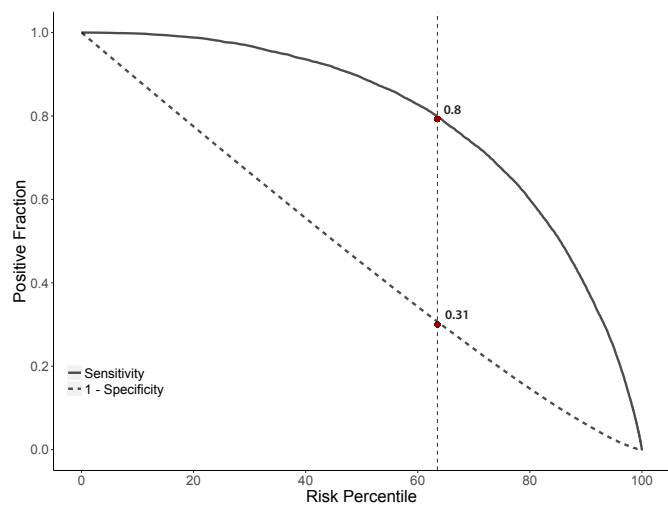

Supplement: NIHMS972686-supplement-Supplemental_Data_File_5.pdf [file NIHMS972686-supplement-Supplemental_Data_File_5.pdf]

**E**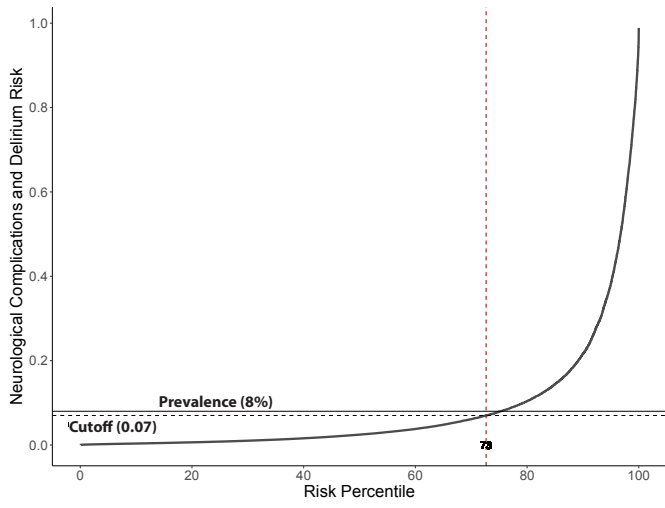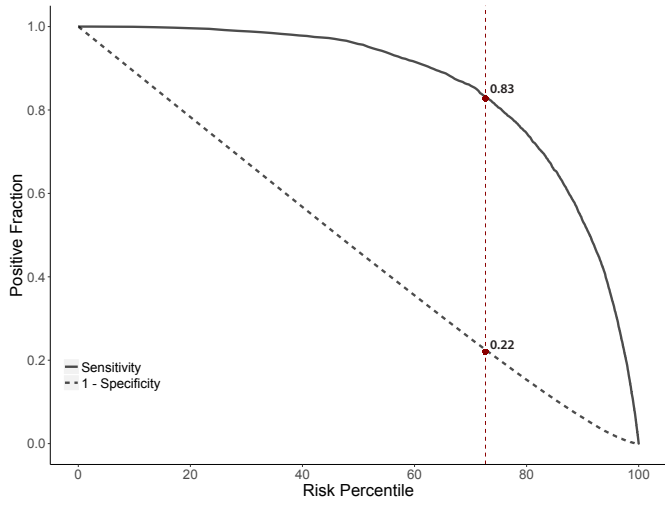**F**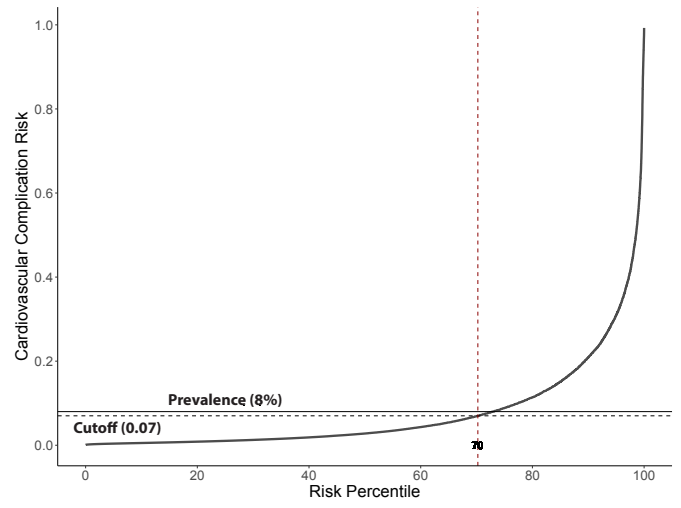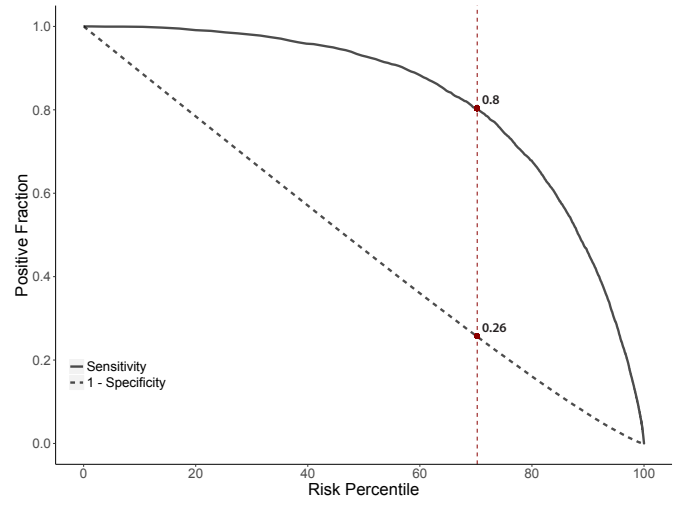

Supplement: NIHMS972686-supplement-Supplemental_Data_File_6.pdf [file NIHMS972686-supplement-Supplemental_Data_File_6.pdf]

**G**

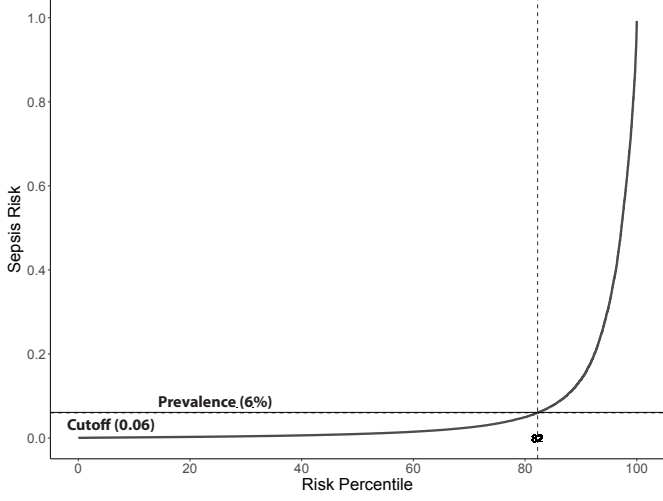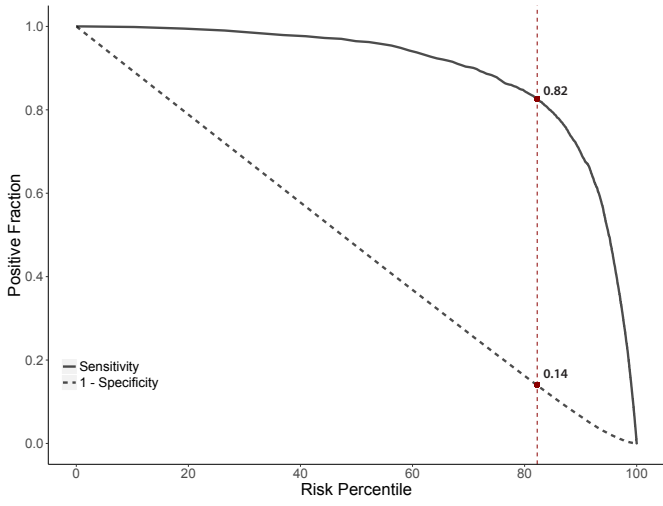

**H**

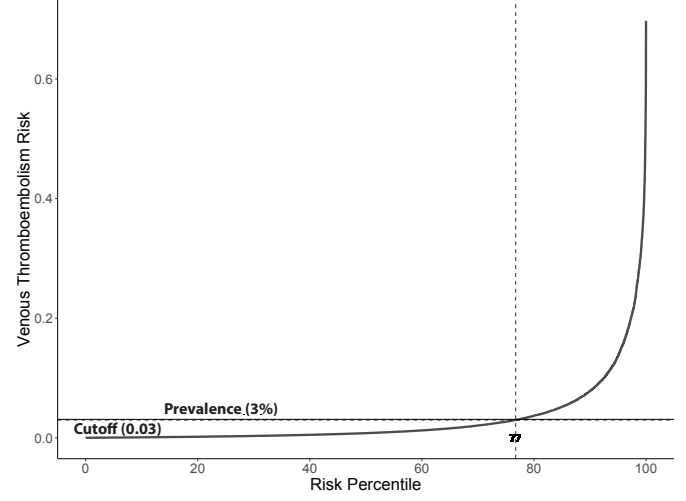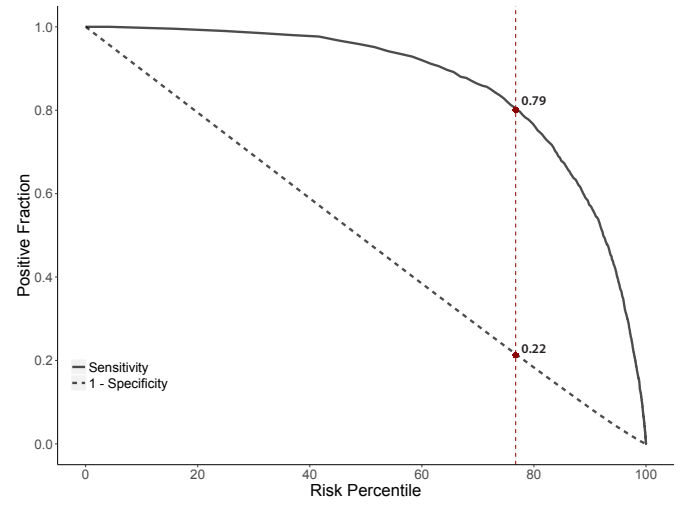

Supplement: NIHMS972686-supplement-Supplemental_Data_File_7.pdf [file NIHMS972686-supplement-Supplemental_Data_File_7.pdf]
